# Supplementary material for: Revealing language development delays in preterm infants compared to full-term infants based on the CCDI
Source: Research Square preprint supplement (doi:10.21203/rs.3.rs-8731965/v1), 2026-02-19
Supplement: Supplementary file 1 [file 0832b58a65576196abf0f36a.xlsx]

## Sheet: Sheet1
Table1 General clinical characteristics and sociodemographic characteristics of children (N=374)
Characteristic	Overall	Premature delivery	Term delivery	p-value2
	N = 3741	N = 1391	N = 2351
Age
1-year-old group	182(48.66%)	12.05 (0.62)	12.11 (0.34)	0.474
2-year-old group	192 (51.34%)	80 (57.55%)	112 (47.66%)	0.226
Gender				0.197
Male	195 (52.14%)	79 (56.83%)	116 (49.36%)
Female	179 (47.86%)	60 (43.17%)	119 (50.64%)
Gestational age (weeks)	36.53 (3.84)	32.20 (2.82)	39.09 (1.07)	<0.001
Birth weight (kg)	2,604.01 (839.66)	1,801.21 (543.67)	3,078.85 (583.30)	<0.001
Status of singleton gestation				1
Singleton	335 (89.57%)	125 (89.93%)	210 (89.36%)
Multiple gestation	39 (10.43%)	14 (10.07%)	25 (10.64%)
Status of caesarean section				<0.001
Caesarean section	222 (59.36%)	105 (75.54%)	117 (49.79%)
Spontaneous delivery	152 (40.64%)	34 (24.46%)	118 (50.21%)
Status of suffocation				<0.001
Suffocation	85 (22.73%)	85 (61.15%)	0 (0.00%)
Absence of suffocation	289 (77.27%)	54 (38.85%)	235 (100.00%)
1n (%); Mean (SD)
2Pearson's Chi-squared test; Wilcoxon rank sum test; Fisher's exact test
